# Supplementary material for: Comparative Analysis of Volatile Compounds in the Flower Buds of Three Panax Species Using Fast Gas Chromatography Electronic Nose, Headspace-Gas Chromatography-Ion Mobility Spectrometry, and Headspace Solid Phase Microextraction-Gas Chromatography-Mass Spectrometry Coupled with Multivariate Statistical Analysis
Source: MDPI journal article supplement (doi:10.3390/molecules29030602), 2024-01-26
Supplement: s1 [file s1]

## Supplementary Data

### Comparative Analysis of Volatile Compounds in the Flower Buds of Three Panax Species Using Fast GC E-Nose, HS-GC-IMS, and HS-SPME-GC-MS Coupled with Multivariate Statistical Analysis

**Table S1.** Details of samples of the flower bud of *P. ginseng* (PGF), *P. quinquefolius* (PQF) and *P. notoginseng* (PNF).

| NO    | Samole Name                           | Province | City    | Batch Code |
|-------|---------------------------------------|----------|---------|------------|
| PGF-1 | flower bud of <i>P. ginseng</i>       | Jilin    | Fusong  | 20220601   |
| PGF-2 | flower bud of <i>P. ginseng</i>       | Jilin    | Fusong  | 20220802   |
| PGF-3 | flower bud of <i>P. ginseng</i>       | Jilin    | Fusong  | 20221002   |
| PGF-4 | flower bud of <i>P. ginseng</i>       | Jilin    | Baishan | 20220703   |
| PGF-5 | flower bud of <i>P. ginseng</i>       | Jilin    | Baishan | 20220901   |
| PGF-6 | flower bud of <i>P. ginseng</i>       | Jilin    | Baishan | 20221008   |
| PGF-7 | flower bud of <i>P. ginseng</i>       | Liaoning | Xinbin  | 20220806   |
| PGF-8 | flower bud of <i>P. ginseng</i>       | Liaoning | Xinbin  | 20220913   |
| PGF-9 | flower bud of <i>P. ginseng</i>       | Liaoning | Xinbin  | 20221011   |
| PQF-1 | flower bud of <i>P. quinquefolius</i> | Jilin    | Fusong  | 20220606   |
| PQF-2 | flower bud of <i>P. quinquefolius</i> | Jilin    | Fusong  | 20220809   |
| PQF-3 | flower bud of <i>P. quinquefolius</i> | Jilin    | Fusong  | 20221008   |
| PQF-4 | flower bud of <i>P. quinquefolius</i> | Jilin    | Baishan | 20220703   |
| PQF-5 | flower bud of <i>P. quinquefolius</i> | Jilin    | Baishan | 20220901   |
| PQF-6 | flower bud of <i>P. quinquefolius</i> | Jilin    | Baishan | 20221008   |
| PQF-7 | flower bud of <i>P. quinquefolius</i> | Liaoning | Xinbin  | 20220801   |
| PQF-8 | flower bud of <i>P. quinquefolius</i> | Liaoning | Xinbin  | 20220907   |
| PQF-9 | flower bud of <i>P. quinquefolius</i> | Liaoning | Xinbin  | 20221003   |
| PNF-1 | flower bud of <i>P. notoginseng</i>   | Yunnan   | Wenshan | 20220806   |
| PNF-2 | flower bud of <i>P. notoginseng</i>   | Yunnan   | Wenshan | 20220902   |
| PNF-3 | flower bud of <i>P. notoginseng</i>   | Yunnan   | Wenshan | 20221011   |
| PNF-4 | flower bud of <i>P. notoginseng</i>   | Yunnan   | Qiubei  | 20220701   |
| PNF-5 | flower bud of <i>P. notoginseng</i>   | Yunnan   | Qiubei  | 20220809   |
| PNF-6 | flower bud of <i>P. notoginseng</i>   | Yunnan   | Qiubei  | 20220911   |
| PNF-7 | flower bud of <i>P. notoginseng</i>   | Yunnan   | Yanshan | 20220906   |
| PNF-8 | flower bud of <i>P. notoginseng</i>   | Yunnan   | Yanshan | 20221010   |
| PNF-9 | flower bud of <i>P. notoginseng</i>   | Yunnan   | Yanshan | 20221113   |

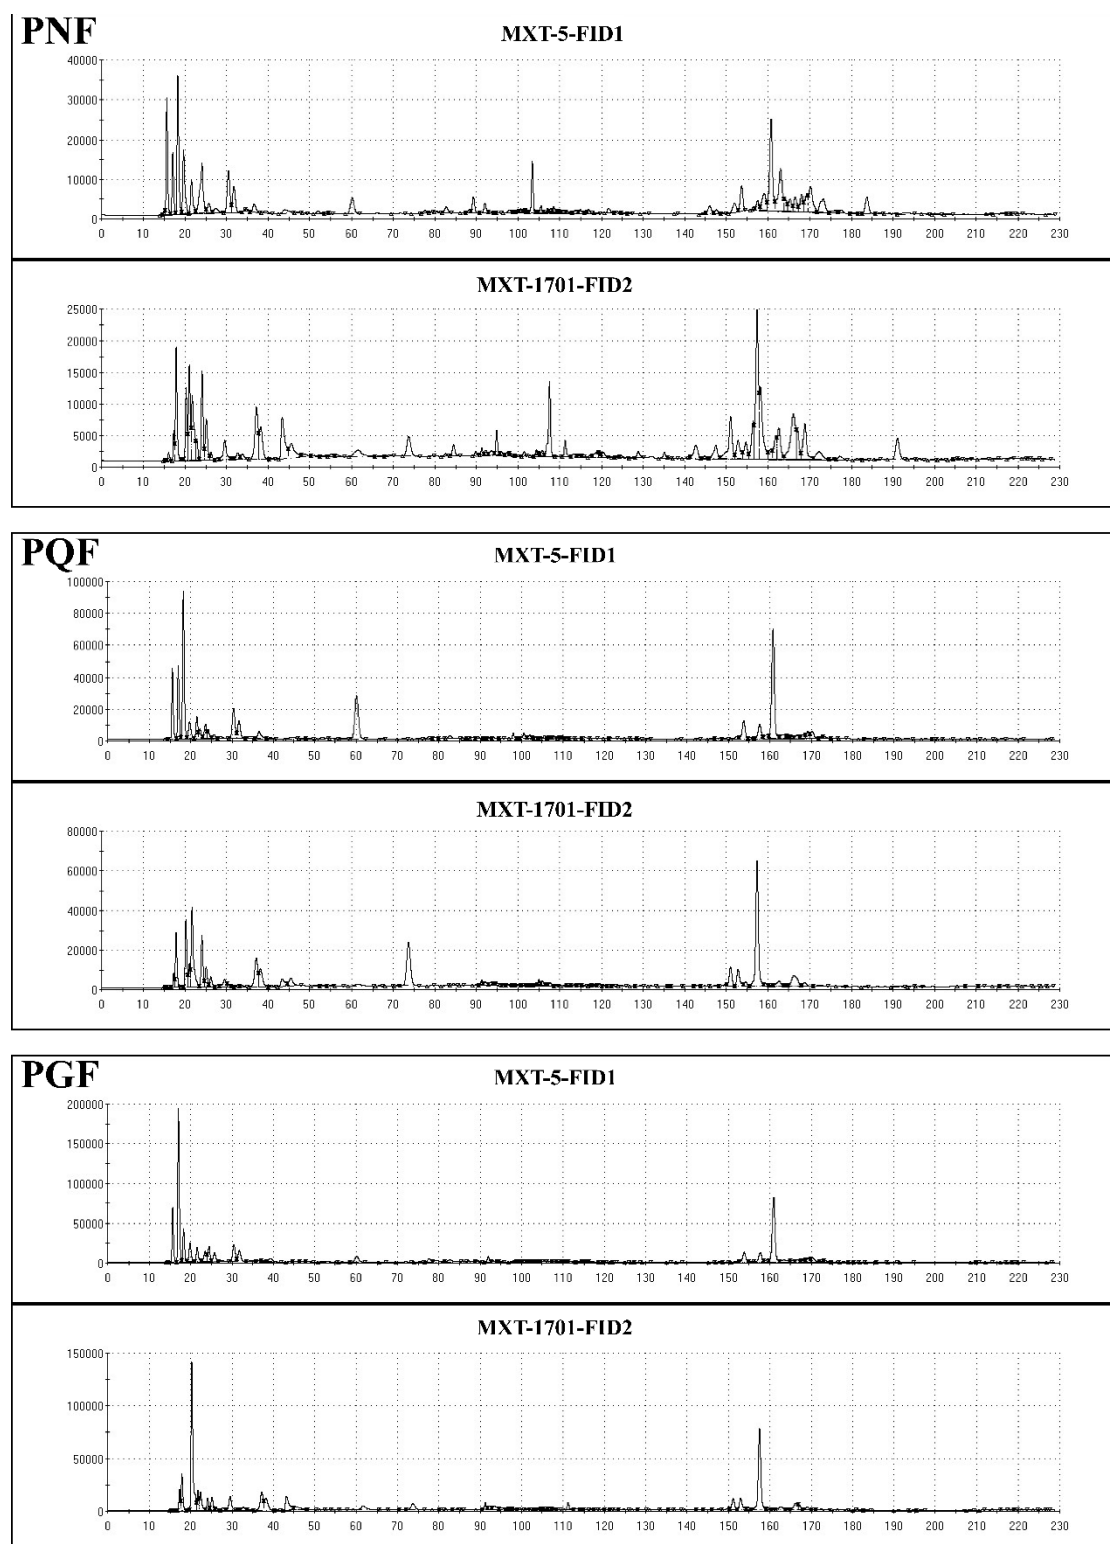

**Figure S1.** (A) The total ion chromatogram (TIC) of the flower bud of PGF, PQF and PNF aroma compounds identified by fast GC e-nose (MXT-5-FID1 and MXT- 1701-FID2).

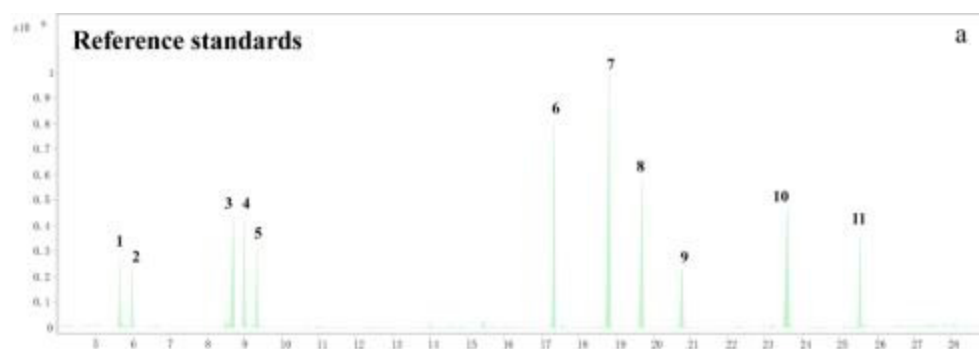

**Figure S2.** Reference compounds spectrogram.
